1 **Botanical Medicines with Activity against Stationary Phase *Bartonella henselae***

2

3 **Xiao Ma<sup>1</sup>, Jacob Leone<sup>2</sup>, Sunjya Schweig<sup>3</sup>, Ying Zhang<sup>1\*</sup>**

4 <sup>1</sup> Department of Molecular Microbiology and Immunology, Bloomberg School of

5 Public Health, Johns Hopkins University, Baltimore, MD 21205, USA

6 <sup>2</sup> FOCUS Health Group, Naturopathic, Novato, CA 94949, USA

7

8 <sup>3</sup> California Center for Functional Medicine, Kensington, CA 94707, USA

9

10

11

12 **\* Corresponding author:**

13 Ying Zhang, MD, PhD

14 Email: [medlife207@yahoo.com](mailto:medlife207@yahoo.com)

15

16

17

18

19 **Keywords:** *Bartonella henselae*, persists, stationary phase, herbal medicine, antimicrobial  
20 activity, botanical medicine, medicinal plant, phytotherapy

21

22

23

24

25

26

27

28

29 **ABSTRACT**

30

31 *Bartonella henselae* is a Gram-negative, facultative intracellular bacterium which is the causative  
32 agent of cat scratch disease. In humans, infections with *B. henselae* can result in acute or chronic  
33 systemic infections with various clinical symptoms including local skin lesions, malaise, aches,  
34 chills, lymphadenopathy, endocarditis, or meningoencephalitis. The current treatment for  
35 *Bartonella* infections with antibiotics such as doxycycline and rifampin is not always effective  
36 presumably due to bacterial persistence. There have been various anecdotal reports of herbal  
37 extracts used for treating patients with persistent *Bartonella* infections but their activity on *B.*  
38 *henselae* is unknown. To test the potential antimicrobial activity of botanical or herbal medicines  
39 and develop better therapies for persistent *Bartonella* infections, in this study, we screened an  
40 herbal product collection against stationary phase *B. henselae in vitro* using SYBR Green I/  
41 propidium iodide (PI) viability assay. These herbal medicines were selected by the fact that they  
42 are commonly used to treat Lyme and co-infections by patients and herbalists, and as a follow-up  
43 to our recent study where these herbs were tested against *B. burgdorferi*. We identified five  
44 herbal product extracts that had high activity against stationary phase *B. henselae* at 0.5% (v/v),  
45 including *Cryptolepis sanguinolenta*, *Juglans nigra*, *Polygonum cuspidatum*, *Scutellaria*  
46 *baicalensis*, and *Scutellaria barbata*. Among them, *Cryptolepis sanguinolenta*, *Juglans nigra*,  
47 and *Polygonum cuspidatum* could eradicate all stationary phase *B. henselae* cells within 7 days at  
48 0.25% (v/v) in drug exposure time-kill assay, whereas *Scutellaria baicalensis* and *Scutellaria*  
49 *barbata* showed relatively poor activity. The minimum inhibitory concentration (MIC)  
50 determination of these top hits indicated they were not only active against stationary phase non-  
51 growing *B. henselae* but also had good activity against log phase growing *B. henselae*. Our  
52 findings may help to develop more effective treatments for persistent *Bartonella* infections.

53

54

55

56

57

58

59

## 60 INTRODUCTION

61

62 *Bartonella* species are fastidious Gram-negative facultative intracellular pathogens with a unique  
63 intraerythrocytic lifestyle, which usually require an obligately bloodsucking arthropod vector and  
64 a mammalian host during their life cycle [1]. At least thirteen *Bartonella* species are known to be  
65 pathogenic in humans, leading to either acute or chronic infections with known diseases such as  
66 cat scratch disease, trench fever, Carrion's disease, and bacillary angiomatosis [2]. Infection  
67 typically begins with cutaneous inoculation and the pathogenesis of *Bartonella* involves  
68 establishing a primary niche in the endothelium [3] before seeding into the blood stream leading  
69 to intraerythrocytic infection [4-6]. *Bartonella* has been described as a "stealth pathogen" [7]  
70 due to its ability to cause persistent bacteremia, evade the immune system, and cause varying  
71 types and severity of symptomatology [6-10]. *Bartonella* can induce vasoproliferative tumor  
72 formation [11] and a recent review of the public health implications of bartonellosis discussed  
73 the need to research *Bartonella*'s potential role in breast cancer tumorigenesis [12]. Preliminary  
74 data have also implicated bartonellosis in neuropsychiatric manifestations including Autism  
75 Spectrum Disorder [13], homicidality [14], and hallucinations [15].

76

77 *Bartonella henselae* is the most common causative agent of cat scratch disease, with symptoms  
78 of malaise, decreased appetite, aches, headache, chills, arthritis, and lymphadenopathy that can  
79 persist for several months [16]. In certain situations, disseminated *B. henselae* may lead to the  
80 development of serious complications including ocular manifestations including neuroretinitis  
81 [17], neurologic manifestations including encephalopathy, seizures, cerebral vasculitis,  
82 meningoencephalitis [18][19][20], visceral organ involvement including hepatomegaly and/or  
83 splenomegaly [21], and cardiac manifestations including endocarditis [2][22], which can have a  
84 particularly high mortality [18]. Case studies have also implicated *B. henselae* in monoclonal and  
85 bclonal gammopathy [23] and various auto-immune manifestations including pediatric acute-  
86 onset neuropsychiatric syndrome (PANS) [24], transverse myelitis [25,26], and autoimmune  
87 thyroiditis [27].

88

89 Emerging evidence suggests *B. henselae* may also serve as a co-infective pathogen in patients  
90 with other vector-borne diseases [12]. In particular, ticks are known to be polymicrobially

91 infected with multiple pathogens [28] including *Borrelia burgdorferi*, the most common etiologic  
92 agent in Lyme disease. Although the ability of ticks to serve as a competent vector for  
93 transmitting *B. henselae* to humans is debated, ticks have been documented to carry *B. henselae*  
94 [12] and case reports link *B. henselae*-related disease following a tick attachment [29-31].  
95 Multiple papers document *B. henselae* exposure in patients with Lyme disease and patients with  
96 co-infections may experience more severe and protracted clinical manifestations [31-34].

97  
98 Currently there is no single treatment effective for all *Bartonella*-associated diseases, with  
99 different antibiotics recommended for use according to different presentations [35]. The first-line  
100 antibiotics for the treatment of *Bartonella*-associated infection include doxycycline,  
101 erythromycin, azithromycin, gentamicin, rifampin, ciprofloxacin, and tetracycline as well as  
102 some drug combinations such as doxycycline plus gentamicin or doxycycline plus rifampin  
103 [35][36]. However, the recommended treatment of systemic *B. henselae* infections is based on  
104 limited trial data [37] with various treatment failures, probably related to antibiotic resistance and  
105 bacterial persistence [36][38]. Therefore, identifying novel antimicrobials targeting persistent  
106 *Bartonella* pathogens could significantly assist in development of improved therapeutic protocols  
107 for the treatment of *Bartonella*-associated diseases.

108  
109 Botanical medicines have a long history of documented use since ancient Mesopotamia, ancient  
110 China and ancient India. The safety and efficacy of these medicines is supported by centuries of  
111 use in various traditional medicine systems such as Ayurveda and Traditional Chinese Medicine  
112 [39-41]. Several recent reports have concluded that the frequency of severe adverse effects  
113 related to the use of botanical medicine is rare [42-44]. Unlike conventional antibiotics, which  
114 can have a detrimental impact on the microbiome and increase microbial resistance [45, 46],  
115 botanical medicines may have a beneficial impact on the microbiome [47]. Many botanical  
116 extracts have been reported to have antimicrobial activities, for example, *Laserpitium zernyi* herb  
117 extracts were active against different bacterial species including *Pseudomonas aeruginosa*,  
118 *Micrococcus luteus*, *Enterococcus faecalis* and *Bacillus subtilis*, and different extracts of *Ononis*  
119 *arvensis* showed antimicrobial activity against *Escherichia coli*, *P. aeruginosa*, *Salmonella*  
120 *typhimurium*, *Staphylococcus aureus* and *Candida albicans*. Some Mediterranean herb extracts  
121 could inhibit growth of representative oral microorganisms and biofilm formation of

122 *Streptococcus mutans* [48-50]. Members of our group previously documented 32 essential oils  
123 derived from botanical medicines that were found to have better activity against stationary phase  
124 *B. henselae* compared to antibiotic controls [51]. It is becoming increasingly important to study  
125 botanical medicines with potential antimicrobial activity for improved treatment of infections  
126 due to antibiotic resistant bacteria. According to the World Health Organization, antibiotic  
127 resistance is currently “one of the biggest threats to global health, food security, and development”  
128 [52].

129  
130 Previously, we have developed a rapid high-throughput drug screen method with the help of  
131 SYBR Green I/ propidium iodide (PI) viability assay, leading to successful identification of  
132 various active drugs as well as drug combinations against stationary phase *Borrelia burgdorferi*  
133 as a surrogate model of persister bacteria [53-56]. In two recent studies, we screened the FDA-  
134 approved drug library and a collection of essential oils using this method to identify active drug  
135 candidates with potential for treating *Bartonella* infections [51][57]. In this current study, we  
136 adapted the same methodology to screen an herbal product collection which we used recently on  
137 *Borrelia burgdorferi* [56] and successfully identified various botanical extracts with activity  
138 against stationary phase *B. henselae*, which has successfully been used as a model of persister  
139 drug screens [53-56] because of its higher content of persister cells than the log phase culture  
140 [58]. The implications of these findings for better therapy of persistent *Bartonella*-associated  
141 infections are discussed.

## 142 143 **MATERIALS AND METHODS**

### 144 145 **Bacterial strain, culture media and culture conditions**

146 *Bartonella henselae* JK53 strain was obtained from BEI Resources (ATCC), NIAID, NIH. *B.*  
147 *henselae* JK53 was cultured in Schneider’s Drosophila medium (Life Technologies Limited,  
148 Paisley, UK) supplemented with 10% fetal bovine serum (FBS) (Sigma-Aldrich, Co., St. Louis,  
149 MO, USA) and 5% sucrose (Fisher Scientific, New Jersey, USA) as described previously  
150 [57][59]. Cultures were incubated in sterile 15 mL or 50 mL polypropylene conical tubes  
151 (Corning, New York, USA) in microaerophilic incubator without shaking at 37 °C, 5% CO<sub>2</sub>.  
152 Based on our previous study, the one-day-old and five-day-old cultures were considered as log

153 phase and stationary phase, respectively [57]. The Columbia sheep blood agar (HemoStat  
154 Laboratories, Dixon, CA, USA) was used to perform the colony count in drug exposure assay,  
155 which was also cultured at 37 °C, 5% CO<sub>2</sub>.

156

### 157 **Drugs and herbal products**

158 A panel of herbal products was purchased from KW Botanicals Inc. (San Anselmo, CA, USA)  
159 and Heron Botanicals (Kingston, WA, USA) [56]. These botanical products were chosen based  
160 on significant antimicrobial activity against other bacterial pathogens shown by previous studies  
161 [60-64], anecdotal clinical usage reported by patients, favorable safety profiles, and the ability to  
162 be absorbed systemically. Most of the botanicals were identified via macroscopic and  
163 organoleptic methods with voucher specimens on file with the respective production facilities.  
164 Additional details on sourcing, testing and validation of botanical and natural medicines used are  
165 summarized in Table S1. Most botanical extracts were provided as alcohol extracts in 30%, 60%,  
166 and 90% alcohol dilutions, and the alcohol used was also tested separately as a control in the  
167 same dilutions of 30%, 60%, and 90%. Herbal products were dissolved in dimethyl sulfoxide  
168 (DMSO) at 5% (v/v), followed by dilution at 1:5 into five-day-old stationary phase cultures to  
169 achieve 1% final concentration. To make further dilutions for evaluating anti-*Bartonella* activity,  
170 the 1% herbal products were further diluted with the same stationary phase cultures to achieve  
171 desired concentrations. Antibiotics including azithromycin (AZI), daptomycin (DAP),  
172 doxycycline (DOX), gentamicin (GEN), methylene blue, miconazole, and rifampin (RIF)  
173 included as controls were purchased from Sigma-Aldrich (USA) and dissolved in appropriate  
174 solvents [65] to form 10 mg/mL stock solutions. All the antibiotic stocks were filter-sterilized by  
175 0.2 µm filters except the DMSO stocks and then diluted and stored at -20 °C.

176

### 177 **Microscopy techniques**

178 *B. henselae* cultures treated with different herbal products or control drugs were stained with  
179 SYBR Green I (10 × stock, Invitrogen) and propidium iodide (PI, 60 µM, Sigma) mixture dye  
180 and then examined with BZ-X710 All-in-One fluorescence microscope (KEYENCE, Inc., Osaka,  
181 Japan). The SYBR Green I/PI pre-mixed dye was added to the sample in a 1:10 ratio of the dye  
182 against the sample volume and mixed thoroughly, followed by incubating in the dark at room  
183 temperature for 15 minutes. SYBR Green I is a green permeant dye that stains all cells whereas

184 propidium iodide (PI) as an orange-red impermeant dye stains only dead or damaged cells with a  
185 compromised cell membrane. Thus, live cells with intact membrane will be stained only by  
186 SYBR Green I as green cells, while damaged or dead cells with a compromised cell membrane  
187 will be stained orange-red by PI. The residual bacterial viability could then be assessed by  
188 calculating the ratio of green/red fluorescence, respectively, as described previously [53]. The  
189 stained samples were confirmed by analyzing three representative images of the same bacterial  
190 cell suspension using fluorescence microscopy. BZ-X Analyzer and Image Pro-Plus software  
191 were used to quantitatively determine the fluorescence intensity.

192

### 193 **Screening of herbal product collection against stationary phase *B. henselae* using SYBR** 194 **Green I/PI viability assay**

195 For the primary herbal products screening, each product was assayed in two concentrations, 1%  
196 (v/v) and 0.5% (v/v). A five-day-old stationary phase *B. henselae* culture was used for the  
197 primary screen. Firstly, 40  $\mu$ L 5% herbal product DMSO stocks were added to 96-well plates  
198 containing 160  $\mu$ L *B. henselae* culture, respectively, to obtain the desired concentration of 1%.  
199 Then the 0.5% concentration was obtained by mixing 100  $\mu$ L 1% treatment with 100  $\mu$ L *B.*  
200 *henselae* culture. Antibiotics including AZI, DAP, DOX, GEN, methylene blue, miconazole and  
201 RIF were used as control drugs at their C<sub>max</sub>. C<sub>max</sub> is a pharmacokinetic measure referring to  
202 the maximum serum concentration that a drug achieves in a specified compartment such as blood  
203 after the drug has been administered. Control solvents including DMSO, 30%, 60%, and 90%  
204 alcohol were also included. Plates were sealed and placed in a 37°C incubator without shaking  
205 over a period of three days. SYBR Green I/ PI viability assay was used to assess the live/dead  
206 cell ratios after drug exposure as described [53]. Briefly, the SYBR Green I/PI dye was added to  
207 the sample followed by incubation in the dark for 15 minutes. Then the plate was read by  
208 microplate reader (HTS 7000 plus Bioassay Reader, PerkinElmer Inc., USA). The green/red (538  
209 nm/650 nm) fluorescence ratio of each well was used for calculating the residual viability  
210 percentage, according to the regression equation of the relationship between residual viability  
211 percentage and green/red fluorescence ratio obtained by least-square fitting analysis as described  
212 [57]. All tests were run in triplicate.

213

214

## 215 **Drug exposure assay of active hits**

216 The active hits from the primary screens were further confirmed by drug exposure assay. The  
217 five-day-old stationary phase *B. henselae* culture was used for drug exposure experiments and  
218 was treated with 0.25% (v/v) active herbal products respectively. Control antibiotics including  
219 AZI, DAP, DOX, GEN, methylene blue, miconazole and RIF were used at their Cmax. Control  
220 solvents were also included. The drug exposure assay was carried out in 15 mL polypropylene  
221 conical tubes over the course of seven days at 37°C, 5% CO<sub>2</sub> without shaking. At each time point,  
222 a portion of bacterial cells was collected by centrifugation and rinsed twice with fresh  
223 Schneider's medium followed by re-suspension in fresh Schneider's medium. Then the cell  
224 suspension was serially diluted and plated on Columbia blood agar plates for viable bacterial  
225 counts (colony forming unit, CFU). The plates were incubated at 37 °C, 5% CO<sub>2</sub> until visible  
226 colonies appeared and the CFU/mL was calculated accordingly. All tests were run in triplicate.

227

## 228 **Minimum inhibitory concentration (MIC) determination of active hits**

229 The standard microdilution method was used to measure the minimum inhibitory concentration  
230 (MIC) of each herbal product needed to inhibit the visible growth of *B. henselae* after a five-day  
231 incubation period as described [51][57]. The diluted one-day-old *B. henselae* log phase culture  
232 was used for MIC determination. The 5% herbal product stocks were added into 96-well plates  
233 containing 1×10<sup>6</sup> bacteria per well with fresh modified Schneider's medium, respectively, to  
234 achieve 1% final concentration. Other lower concentrations were obtained by mixing 1%  
235 treatment with diluted one-day-old log phase *B. henselae* culture. Plates were sealed and  
236 incubated at 37 °C without shaking for five days. Then the bacterial cell proliferation was  
237 assessed using the SYBR Green I/PI assay and the bacterial counting chamber. The MIC is the  
238 lowest concentration of the herbal product that prevented the visible growth of *B. henselae*. All  
239 tests were run in triplicate.

240

## 241 **Statistical analysis**

242 The statistical analysis was performed using two-tailed Student's *t*-test. Mean differences were  
243 considered statistically significant if P value was < 0.05. Analyses were performed using Image  
244 Pro-Plus, GraphPad Prism, and Microsoft Office Excel.

245



## 246 RESULTS

247

### 248 Screening the herbal product collection to identify herbs active against non-growing 249 stationary phase *B. henselae*

250 In this study, we adapted the SYBR Green I/PI viability assay developed previously [51][57] to  
251 identify herbal products with significant activity against stationary phase *B. henselae* compared  
252 to antibiotic controls. As described above, we tested a panel of botanical extracts and their  
253 corresponding controls against a five-day-old stationary phase *B. henselae* culture in 96-well  
254 plates incubated for 3 days. For primary screens, all the herbal products were applied at two  
255 concentrations, 1% (v/v) and 0.5% (v/v), respectively. Meanwhile, the currently used antibiotics  
256 for bartonellosis treatment such as doxycycline, azithromycin, gentamicin, and rifampin were  
257 included as control drugs for comparison, as well as the previously identified FDA-approved  
258 drugs effective against *B. henselae* including daptomycin, methylene blue and miconazole [57]  
259 (Table 1). All of the pharmaceutical antibiotics were used at their Cmax. In the primary screens,  
260 four different alcohol extracts of *Juglans nigra*, three different alcohol extracts from *Cryptolepis*  
261 *sanguinolenta*, one alcohol extract of *Polygonum cuspidatum*, one glycerite extract of  
262 *Polygonum cuspidatum*, one glycerite extract of *Scutellaria baicalensis* (huang qin), and one  
263 glycerite extract of *Scutellaria barbata* (ban zhi lian) at both 1% (v/v) and 0.5% (v/v) were found  
264 to have strong activity against stationary phase *B. henselae* compared to the control antibiotics  
265 including AZI, DOX, GEN, and RIF according to the plate reader results (Table 1). In contrast,  
266 *Andrographis paniculate*, *Stevia rebaudiana*, *Artemisia annua*, *Uncaria rhynchophylla*, *Uncaria*  
267 *tomentosa*, *Rhizoma coptidis*, *Citrus paradise*, *Dipsacus fullonum*, *Campsiandra angustifolia*,  
268 *Otoba parvifolia* and colloidal silver did not show significant activity against stationary phase *B.*  
269 *henselae* (Table S2). Therefore, the following active herb extracts were selected as top hits,  
270 including *Juglans nigra* 30%, 45%, 60%, and 90% alcohol extract, *Polygonum cuspidatum* 30%  
271 alcohol extract, *Polygonum cuspidatum* glycerite extract, *Cryptolepis sanguinolenta* 30%, 60%,  
272 and 90% alcohol extract, *Scutellaria baicalensis* glycerite extract, and *Scutellaria barbata*  
273 glycerite extract. These top hits were chosen based on the fact that a lower percentage of viable  
274 cells remained compared to the other natural antimicrobials used in this study as well as  
275 exhibiting significantly better activity compared to the current antibiotics used to treat *Bartonella*  
276 infections, including AZI, DOX, GEN, and RIF, as indicated by the statistically analysis that the

277 P value was  $< 0.05$ . Our previous experience showed some compounds in the herbal extracts  
278 could interfere with the SYBR Green I/PI assay due to their autofluorescence. To eliminate this  
279 impact, we checked the residual cell viability by examining microscope images of the herbal  
280 extract treated samples to confirm the plate reader results. As shown by fluorescence microscopy,  
281 solvents such as DMSO and alcohol did not have significant impact on residual bacterial cell  
282 viability compared to the drug free control (Figure 1 and Table 1), as the P value was  $> 0.05$ .  
283 Clinically used antibiotics against *Bartonella* infections such as AZI and DOX only showed  
284 weak activity when used at their Cmax (residual viability above 60%) (Table 1). Antibiotics  
285 reported to have a clinical improvement for *Bartonella* infections including GEN and RIF  
286 showed relatively better activity (residual viability below 50%) against stationary phase *B.*  
287 *henselae* than AZI and DOX. FDA-approved drugs that we identified as effective against  
288 stationary phase *B. henselae* (DAP, methylene blue, and miconazole) [57] had better activity  
289 (residual viability below 40%) than the other antibiotics tested. Among the five top herbal hits  
290 that had better activity (residual viability between 0% and 16%) against stationary phase *B.*  
291 *henselae* than most control antibiotics, the most active herbal products were *Juglans nigra* and  
292 *Polygonum cuspidatum* alcohol extracts of different concentrations. However, the fluorescence  
293 microscope observation of *Juglans nigra* 30% and 45% alcohol extracts, and *Polygonum*  
294 *cuspidatum* glycerite extract at 0.5% treatment exhibited significantly higher percentage of green  
295 (live) cells compared with the plate reader results (Figure 1 and Table 1), as indicated by the  
296 statistically analysis that the P value was  $< 0.05$ , which were also higher than that of most control  
297 antibiotics, indicating the relatively poor accuracy of the plate reader results and poor activity of  
298 these herbal products at these particular concentrations. Therefore, they were excluded from  
299 active hits for subsequent MIC testing and drug exposure assay (see below). Alcohol extracts  
300 from *Cryptolepis sanguinolenta* of different concentrations also exhibited strong activity against  
301 stationary phase *B. henselae* as shown by red (dead) cells in fluorescence microscope  
302 observation (Figure 1), which is consistent with the plate reader results. Glycerite extracts from  
303 the two *Scutellaria* plants, including *Scutellaria baicalensis* (huang qin) and *Scutellaria barbata*  
304 (ban zhi lian), also showed good activity with low percentages of residual viable bacterial cells  
305 remaining (Figure 1).

306

307 **Time-kill curves of active hits**

308 To further demonstrate the efficacy of the active herbal products identified from the primary  
309 screens in eradicating persistent *B. henselae* cells, we performed a time-kill drug exposure assay  
310 against a five-day-old stationary phase *B. henselae* culture at a lower concentration of 0.25%  
311 (v/v), along with their corresponding solvent controls. Meanwhile, clinically used antibiotics to  
312 treat *Bartonella* infections including AZI, DOX, GEN, and RIF were used at their C<sub>max</sub> as  
313 controls. Compared to the drug free control, as shown in Figure 2 and Table 2, some clinically  
314 used antibiotics such as AZI and DOX showed poor activity in killing stationary phase *B.*  
315 *henselae* partly due to their low C<sub>max</sub>. Other antibiotics such as GEN and RIF exhibited better  
316 activity which could eradicate all *B. henselae* cells by day 7 and day 5, respectively. The  
317 difference of residual viabilities of stationary phase *B. henselae* after treatment by control  
318 solvents and without drug treatment was not statistically significant, as the P value was > 0.05.  
319 All three *Cryptolepis sanguinolenta* alcohol extracts of different concentrations were able to  
320 eradicate all *B. henselae* cells in the seven-day drug exposure, where *Cryptolepis sanguinolenta*  
321 60% alcohol extract was the most active herbal product that killed *B. henselae* with no detectable  
322 CFU after five-day exposure. *Juglans nigra* in 60% and 90% alcohol extracts both exhibited  
323 good activity that eradicated all *B. henselae* cells without viable cells being recovered after the  
324 seven-day drug exposure. *Polygonum cuspidatum* 30% alcohol extract was also effective to kill  
325 all *B. henselae* cells by day 7. However, *Scutellaria barbata* (ban zhi lian) and *Scutellaria*  
326 *baicalensis* (huang qin) showed poor activity at the concentration of 0.25% (v/v) during this  
327 seven-day drug exposure, with considerable numbers of viable cells remaining after treatment.

328

### 329 **Minimum inhibitory concentration (MIC) determination of active hits**

330 The activity of antibiotics against non-growing bacteria is not always correlated with that against  
331 growing bacteria [57]. Thus, it was also necessary to determine the MICs of these active herbal  
332 products against log phase growing *B. henselae*. The MIC determination of herbal products for *B.*  
333 *henselae* was conducted by the standard microdilution method as described [51][57]. As shown  
334 in Table 3, *Juglans nigra* 60% extract was the most active herbal product among the top 5 hits,  
335 capable of inhibiting visible *B. henselae* proliferation at 0.125%-0.25% (v/v). Other herbal  
336 products including *Juglans nigra* 90% alcohol extracts, *Polygonum cuspidatum* 30% alcohol  
337 extract, *Cryptolepis sanguinolenta* 30%, 60%, and 90% alcohol extracts, *Scutellaria baicalensis*  
338 (huang qin), and *Scutellaria barbata* (ban zhi lian) had similar activity against growing *B.*

339 *henselae* such that they inhibited log phase *B. henselae* proliferation at 0.25%-0.5% (v/v). These  
340 results indicated that these top hits of herbal products were not only active against non-growing  
341 stationary phase *B. henselae*, but also effective against log phase growing *B. henselae*.

342

## 343 **DISCUSSION**

344

345 In this study, we successfully applied the SYBR Green I/PI viability assay to evaluate a panel of  
346 botanical products for their activity against stationary phase *B. henselae* as a model of persister  
347 drug screens [51][57]. We identified some herbal products that had high activity at 1% (v/v)  
348 concentration compared to clinically used antibiotics, including extracts of *Juglans nigra*,  
349 *Cryptolepis sanguinolenta*, *Polygonum cuspidatum*, *Scutellaria baicalensis*, and *Scutellaria*  
350 *barbata*. Among these top hits, three herbal product extracts could eradicate all stationary *B.*  
351 *henselae* cells without CFU being detected within a seven-day drug exposure at a low  
352 concentration of 0.25% (v/v), including *Cryptolepis sanguinolenta* 30%, 60%, 90% alcohol  
353 extracts, *Juglans nigra* 60%, 90% alcohol extracts, and *Polygonum cuspidatum* 30% alcohol  
354 extracts. The MIC determination of these active hits showed they were also effective in  
355 inhibiting the growth of log phase *B. henselae*.

356

357 These plant species whose extracts we found to be active against *B. henselae* have also been  
358 reported to have various biological activities in previous studies. Different parts of various  
359 species from genus *Juglans* have shown pain-relieving, antioxidant, antibacterial, antifungal and  
360 antitumor activities [66-68]. In particular, *Juglans nigra* exhibited both bacteriostatic activity and  
361 bactericidal activity against *Borrelia* based on *in vitro* studies [60][69]. Previous studies have  
362 profiled the phytochemicals of *Juglans* plants, including different types of steroids, flavonoid C-  
363 glycoside, flavones, essential oil components, and tannins [70]. *Juglans* contain several active  
364 constituents with potential importance to human health including juglone, phenolic acids,  
365 flavonoids, and catechins (including epigallocatechin) [71-75]. A study comparing leaf essential  
366 oils of *J. regia* and *J. nigra* further showed *J. nigra* leaf oil was less phytotoxic [76]. The safety  
367 of *Juglans nigra* use in humans has not been adequately studied however it has a long history of  
368 anecdotal use and the oral LD50 of juglone in rats is calculated at 112mg/kg [77].

369

370 *Cryptolepis sanguinolenta* and its constituents were reported to have many biological activities  
371 including antibacterial, antifungal, anti-inflammatory, anticancer, antimalarial and anti-amoebic  
372 properties [61][78-82]. A recent review has assessed the phytochemistry and pharmacology of  
373 *Cryptolepis sanguinolenta* and concluded that although there may be some concern regarding  
374 potential reproductive toxicity, it is generally safe at doses below 500mg/kg and may serve as  
375 promising source of potential antimicrobial agent(s) [83]. Among constituents and secondary  
376 metabolites of the plant identified with antimicrobial activity, an alkaloid called cryptolepine was  
377 the most well-studied and considered to be the most important active component. Cryptolepine  
378 was reported to have a lytic effect on *S. aureus* as seen in SEM photomicrographs which led to  
379 altered cell morphology, and was able to intercalate into DNA at cytosine-cytosine sites or  
380 inhibited the activity of topoisomerase causing DNA damage [84-86]. *Cryptolepis sanguinolenta*  
381 was reported to be highly effective and non-toxic in the treatment of uncomplicated malaria in a  
382 small randomized open trial of 44 patients [87]. *Cryptolepis sanguinolenta* is also used  
383 anecdotally to treat a malaria-like tickborne infection called Babesiosis [88]. Given its anecdotal  
384 use to treat Babesiosis, the results of the current study on *B. henselae*, and the results of our  
385 previous study on *B. burgdorferi* [56], *Cryptolepis sanguinolenta* represents a unique potential  
386 therapeutic agent to treat multiple tickborne infections. Future studies are needed to elucidate  
387 more specific antimicrobial mechanisms of cryptolepine as well as other active ingredients  
388 against infectious pathogens such as *B. henselae*. *Polygonum cuspidatum* has been documented  
389 to have antibacterial effects against *Vibrio vulnificus* [89], *Streptococcus mutans* [90] and  
390 *Streptococcus* associated biofilms [91]. Its constituents have also been shown to have  
391 antimicrobial, anti-tumor, anti-inflammatory, neuroprotective, and cardioprotective effects [92-  
392 96]. One of the most active constituents is a polyphenol called resveratrol, which was reported to  
393 be active against log phase *Borrelia burgdorferi* and *Borrelia garinii* by *in vitro* testing [60]. In  
394 addition, another active constituent called emodin (6-methyl-1,3,8-trihydroxyanthraquinone) has  
395 been shown to have activity against stationary phase *Borrelia burgdorferi* cells [97]. A study  
396 unraveling the mechanism of action of *Polygonum cuspidatum* using a network pharmacology  
397 approach, suggested that polydatin might play a pivotal role in the therapeutic effects of  
398 *Polygonum cuspidatum* [98]. Recent trials using *Polygonum cuspidatum* have not reported  
399 significant toxicity [99, 100]. One of the active constituents, resveratrol, has been shown to be  
400 rapidly absorbed [101], well-tolerated [102] and associated with minimal toxicity except mild

401 diarrhea at an oral dose of 2000mg 2x/day for 2 weeks [103].

402  
403 Our study is the first to identify the antimicrobial activity of extracts from *Juglans nigra*,  
404 *Cryptolepis sanguinolenta*, and *Polygonum cuspidatum* against stationary phase *B. henselae*. In  
405 addition, considering the possibility of *B. henselae* coinfection among Lyme and tick-borne  
406 disease patients, the overlap of active herbal products against both *B. henselae* identified in our  
407 current study and *B. burgdorferi* according to our previous study [56], including *Cryptolepis*  
408 *sanguinolenta*, *Juglans nigra*, and *Polygonum cuspidatum*, should provide a promising strategy  
409 for better treatment of coinfections with both pathogens.

410  
411 In this current study, clinically used antibiotics for treating *Bartonella*-associated infections  
412 including AZI and DOX showed weak activity in eradicating stationary phase *B. henselae* cells  
413 (Table 1, Figure 1 and Figure 2). This finding coincides with the reported discrepancies in  
414 antibiotic efficacies between *in vitro* MIC data and clinical data from patients [35]. The poor  
415 activities of current clinically used antibiotics against stationary phase *B. henselae* as shown in  
416 our study could partly explain clinically documented treatment failure and could be in part due to  
417 persistent infection. This phenomenon may also be partly due to the limited antibacterial activity  
418 of these antibiotics. Doxycycline inhibits bacterial protein synthesis by binding to the 30S  
419 ribosomal subunit [104]. Azithromycin could also inhibit bacterial protein synthesis by binding  
420 to the 50S ribosomal subunit, and thus prevent bacteria from growing [105]. Although these  
421 antibiotics all target growing bacteria, they are not very effective at killing non-growing  
422 stationary phase *B. henselae*, and thus could lead to treatment failure in persistent and chronic  
423 infections. Conversely, the herbal extracts could be promising candidates for treating persistent *B.*  
424 *henselae* because they contain multiple active phytochemicals including steroids, flavones,  
425 tannins and more. These compounds have complex and synergistic effects and thus have  
426 potentially broader antimicrobial activity. Many of these phytochemicals are lipophilic and could  
427 target the bacterial cell membrane, which is an important target of persister drugs like  
428 pyrazinamide [106] and daptomycin [107], especially when persistent bacterial cells are  
429 aggregated together (Figure 1). The high lipophilicity of these phytochemicals, which could  
430 cause bacterial cell membrane damage, could be responsible for the aggregated bacterial forms  
431 and also explain for the varying numbers of bacterial cells among different samples seen in  
432 microscopic pictures (Figure 1).

433  
434 Despite the promising findings of the herbal extracts active against *B. henselae*, future studies are  
435 needed to identify the active ingredients of these herbs and to better understand their specific  
436 antimicrobial mechanisms of action. It would also be of interest to test compounds like juglone,  
437 cryptolepine, resveratrol, and emodin which are known active components of the *Juglans nigra*,  
438 *Cryptolepis sanguinolenta* and *Polygonum cuspidatum* herbs, on *B. henselae* in future studies.  
439 Different parts of these plants might have different antimicrobial activities because of varying  
440 concentrations of the active compounds they contained, and different solvents used to extract the  
441 compounds could also significantly affect their activity. Therefore, the pharmacokinetic profiles  
442 of active components should be studied thoroughly in the future, as well as the optimal extraction  
443 strategy to obtain the maximally effective ingredients in order to better determine the utility and  
444 practicality of these active herbal medicines.

445  
446 The present study only tested the activity of herbal products against *B. henselae in vitro* and  
447 there are a few points that are important to address. For one, *B. henselae* is a facultative  
448 intracellular pathogen and could reside and propagate inside mammalian erythrocytes and/or  
449 endothelial cells. Therefore, it will be of interest to assess the activity of these identified  
450 candidates against intracellular *B. henselae ex vivo* and *in vivo* in animal models of infection  
451 [108] in the future. The host cell can provide the pathogen with protective shelter from the action  
452 of drugs and herbal antimicrobials as well as the host immune system, therefore the efficacy of  
453 these antimicrobials *in vivo* might differ from that *in vitro* [11]. Additionally, it is important to  
454 note that botanical medicines have multiple mechanisms of action beyond the antimicrobial  
455 activity that was assessed in the present study. For example, botanicals have been shown to exert  
456 effects via multiple mechanisms with potential benefit in *Bartonella* infections including anti-  
457 inflammatory activity, immune modulation/stimulation, microbiome modulation, endothelial cell  
458 support and biofilm disruption. Future studies are needed to assess the safety and efficacy of  
459 these herbal products in appropriate animal models of *Bartonella* infections where broader  
460 biologic mechanisms of action including their effects on the host can be evaluated.

461  
462 In the future we also hope to test different combinations of active herbal products and their active  
463 constituents with and without antibiotics to develop better treatments. As indicated by the Yin-

464 Yang model, the bacterial pathogen has a heterogeneous population, with persister population  
465 (Yin) and growing population (Yang), which are also composed of various subpopulations with  
466 varying metabolic or dormant states in continuum [38]. Therefore, it should be reasonable to  
467 deploy drug/herb or herb/herb combinations for more effective treatments, with different drugs  
468 or herbal medicines targeting different bacterial subpopulations in varying physiological states.  
469 Indeed, members of our group recently demonstrated that antibiotic combinations were more  
470 effective in eradicating *in vitro* stationary phase and biofilm *B. henselae* compared to single  
471 antibiotics [109]. Our goal is to use the herbal medicines we identified in this study to develop  
472 more safe and effective treatments for persistent bartonellosis.

473

#### 474 **Conflicts of Interest**

475

476 Jacob Leone ND is owner of two naturopathic medical practices, FOCUS Health Group and  
477 Door One Concierge, which provides treatment to patients with tick-borne diseases. Dr. Leone  
478 does receive profits from medical services and botanical preparations he exclusively makes  
479 available to patients in these two practices and does not currently sell botanical products  
480 commercially.

481

#### 482 **Acknowledgments**

483

484 We thank herbalists Eric Yarnell ND and Brian Kie Weissbuch for providing botanical extracts  
485 for evaluation in this study. We thank BEI Resources/ATCC, NIAID, NIH for providing  
486 *Bartonella henselae* JK53 strain used in this study. We gratefully acknowledge the support of our  
487 work by the Bay Area Lyme Foundation, the Steven & Alexandra Cohen Foundation, LivLyme  
488 Foundation, Global Lyme Alliance, NatCapLyme, and the Einstein-Sim Family Charitable Fund.

489

490

491

492

493

494

495

496



497

498 **Table 1. Activity of top active herbal products against stationary phase *B. henselae*<sup>1</sup>**

| Herbal Products (HP) and Control Drugs               | Trade Names of Herbal Products | Residual Viability (%) after 1% HP or Antibiotic Treatment |                         | Residual Viability (%) after 0.5% HP Treatment |                         |
|------------------------------------------------------|--------------------------------|------------------------------------------------------------|-------------------------|------------------------------------------------|-------------------------|
|                                                      |                                | Plate Reader <sup>2</sup>                                  | Microscope <sup>3</sup> | Plate Reader <sup>2</sup>                      | Microscope <sup>3</sup> |
| Drug free control                                    |                                | 70%                                                        | 75%                     |                                                |                         |
| DMSO control                                         |                                | 60%                                                        | 70%                     |                                                |                         |
| 30% alcohol                                          |                                | 70%                                                        | 78%                     |                                                |                         |
| 60% alcohol                                          |                                | 80%                                                        | 82%                     |                                                |                         |
| 90% alcohol                                          |                                | 65%                                                        | 63%                     |                                                |                         |
| AZI                                                  |                                | 70%                                                        | 65%                     |                                                |                         |
| DOX                                                  |                                | 66%                                                        | 60%                     |                                                |                         |
| GEN                                                  |                                | 44%                                                        | 50%                     |                                                |                         |
| RIF                                                  |                                | 31%                                                        | 45%                     |                                                |                         |
| DAP                                                  |                                | 6%                                                         | 10%                     |                                                |                         |
| Methylene Blue                                       |                                | 29%                                                        | 35%                     |                                                |                         |
| Miconazole                                           |                                | 40%                                                        | 50%                     |                                                |                         |
| <i>Juglans nigra</i> 45% AE <sup>5</sup>             | Hu tao ren                     | 0% <sup>4</sup>                                            | 0%                      | 9%                                             | 59%                     |
| <i>Juglans nigra</i> 60% AE <sup>5</sup>             | Black walnut                   | 0% <sup>4</sup>                                            | 0%                      | 4%                                             | 32%                     |
| <i>Juglans nigra</i> 90% AE <sup>5</sup>             | Black walnut                   | 0% <sup>4</sup>                                            | 7%                      | 6%                                             | 30%                     |
| <i>Juglans nigra</i> 30% AE <sup>5</sup>             | Black walnut                   | 2%                                                         | 2%                      | 6%                                             | 63%                     |
| <i>Polygonum cuspidatum</i> 30% AE <sup>5</sup>      | Japanese knotweed              | 6%                                                         | 0%                      | 8%                                             | 21%                     |
| <i>Polygonum cuspidatum</i> GE <sup>6</sup>          | Hu zhang                       | 8%                                                         | 18%                     | 13%                                            | 70%                     |
| <i>Cryptolepis sanguinolenta</i> 30% AE <sup>5</sup> | Cryptolepis                    | 8%                                                         | 10%                     | 14%                                            | 42%                     |
| <i>Scutellaria baicalensis</i> GE <sup>6</sup>       | Huang qin                      | 8%                                                         | 12%                     | 11%                                            | 25%                     |
| <i>Scutellaria barbata</i> GE <sup>6</sup>           | Ban zhi lian                   | 8%                                                         | 50%                     | 2%                                             | 48%                     |
| <i>Cryptolepis sanguinolenta</i> 60% AE <sup>5</sup> | Cryptolepis                    | 10%                                                        | 24%                     | 14%                                            | 34%                     |
| <i>Cryptolepis sanguinolenta</i> 90% AE <sup>5</sup> | Cryptolepis                    | 11%                                                        | 25%                     | 14%                                            | 47%                     |

499 <sup>1</sup> A five-day-old stationary phase *B. henselae* culture was treated with herbal products (1% or 0.5%) (v/v)  
 500 or control drugs for three days. Drug concentrations used in this experiment were based on their Cmax  
 501 and were as follows: 0.2 µg/mL AZI, 2.4 µg/mL DOX, 10 µg/mL GEN, 7.8 µg/mL RIF, 60 µg/mL DAP,  
 502 2.9 µg/mL methylene blue, and 6.3 µg/mL miconazole. <sup>2</sup> Residual viability was calculated according to

503 the regression equation and the ratio of Green/Red fluorescence obtained by SYBR Green I/PI assay.<sup>3</sup>  
 504 Residual viability was assayed by fluorescence microscope counting.<sup>4</sup> Values of SYBR Green I/PI  
 505 calculated by the plate reader were lower than 100% dead cells.<sup>5</sup> Abbreviation: AE: alcohol extract; GE:  
 506 glycerite extract.

507

508 **Table 2. Drug exposure assay of top active herbal products against *B. henselae* stationary**  
 509 **phase culture<sup>1</sup>**

| Herbal Products<br>and Control Drugs <sup>2</sup>    | CFU/mL after Drug Exposure  |                             |                             |                             |
|------------------------------------------------------|-----------------------------|-----------------------------|-----------------------------|-----------------------------|
|                                                      | 1 Day                       | 3 Day                       | 5 Day                       | 7 Day                       |
| Drug free control                                    | $1.45 \pm 0.26 \times 10^7$ | $9.17 \pm 1.44 \times 10^6$ | $1.67 \pm 0.29 \times 10^6$ | $1.33 \pm 0.29 \times 10^4$ |
| DMSO                                                 | $2.07 \pm 0.12 \times 10^7$ | $9.33 \pm 0.58 \times 10^6$ | $1.50 \pm 0.50 \times 10^6$ | $1.50 \pm 0.50 \times 10^4$ |
| 30% alcohol                                          | $4.17 \pm 1.04 \times 10^7$ | $9.50 \pm 1.32 \times 10^6$ | $1.33 \pm 0.58 \times 10^6$ | $1.83 \pm 0.76 \times 10^4$ |
| 60% alcohol                                          | $3.33 \pm 0.29 \times 10^7$ | $1.02 \pm 0.13 \times 10^7$ | $2.50 \pm 1.00 \times 10^6$ | $2.17 \pm 0.29 \times 10^4$ |
| 90% alcohol                                          | $3.17 \pm 0.29 \times 10^7$ | $9.00 \pm 1.50 \times 10^6$ | $1.17 \pm 0.29 \times 10^6$ | $4.33 \pm 1.15 \times 10^4$ |
| AZI                                                  | $1.87 \pm 0.32 \times 10^7$ | $7.00 \pm 1.00 \times 10^6$ | $8.83 \pm 1.44 \times 10^5$ | $2.17 \pm 0.29 \times 10^4$ |
| DOX                                                  | $2.50 \pm 1.00 \times 10^7$ | $6.17 \pm 1.76 \times 10^6$ | $9.67 \pm 2.47 \times 10^5$ | $1.83 \pm 1.15 \times 10^4$ |
| GEN                                                  | $5.00 \pm 0.00 \times 10^4$ | $1.00 \pm 0.00 \times 10^3$ | $8.50 \pm 0.87 \times 10^2$ | 0                           |
| RIF                                                  | $5.83 \pm 1.76 \times 10^6$ | $5.83 \pm 2.57 \times 10^4$ | 0                           | 0                           |
| <i>Juglans nigra</i> 60%<br>AE                       | $3.67 \pm 0.76 \times 10^6$ | $6.67 \pm 2.89 \times 10^4$ | $1.02 \pm 0.21 \times 10^5$ | 0                           |
| <i>Juglans nigra</i> 90%<br>AE                       | $3.83 \pm 3.69 \times 10^6$ | $2.67 \pm 0.58 \times 10^6$ | $4.83 \pm 1.04 \times 10^2$ | 0                           |
| <i>Cryptolepis</i><br><i>sanguinolenta</i> 30%<br>AE | $6.00 \pm 0.87 \times 10^6$ | $2.83 \pm 0.76 \times 10^6$ | $6.33 \pm 1.26 \times 10^4$ | 0                           |
| <i>Cryptolepis</i><br><i>sanguinolenta</i> 60%<br>AE | $5.33 \pm 2.25 \times 10^4$ | $2.67 \pm 1.04 \times 10^5$ | 0                           | 0                           |
| <i>Cryptolepis</i><br><i>sanguinolenta</i> 90%<br>AE | $7.83 \pm 2.75 \times 10^6$ | $9.50 \pm 3.97 \times 10^5$ | $2.17 \pm 1.04 \times 10^2$ | 0                           |
| <i>Polygonum</i><br><i>cuspidatum</i> 30% AE         | $7.17 \pm 1.61 \times 10^6$ | $2.33 \pm 0.29 \times 10^6$ | $5.50 \pm 3.12 \times 10^2$ | 0                           |
| <i>Scutellaria barbata</i><br>GE                     | $1.03 \pm 0.20 \times 10^7$ | $3.17 \pm 1.04 \times 10^6$ | $3.17 \pm 0.58 \times 10^5$ | $3.17 \pm 0.58 \times 10^3$ |
| <i>Scutellaria</i><br><i>baicalensis</i> GE          | $9.00 \pm 0.50 \times 10^6$ | $2.83 \pm 0.76 \times 10^6$ | $6.50 \pm 2.78 \times 10^5$ | $7.83 \pm 0.29 \times 10^3$ |

510 <sup>1</sup> A five-day-old stationary phase *B. henselae* culture was treated with herbal products or control drugs.  
 511 The beginning CFU for the five-day-old stationary phase *B. henselae* culture was about  $2 \times 10^7$  CFU/mL.  
 512 At different time points of drug exposure (day 1, day 3, day 5, and day 7), portions of bacteria were  
 513 removed, washed, and plated on Columbia blood agar for CFU counts.<sup>2</sup> The herbal product concentration  
 514 used in this experiment was 0.25% (v/v). Drug concentrations used in this experiment were based on their  
 515 Cmax and were as follows: 0.2 µg/mL AZI, 2.4 µg/mL DOX, 10 µg/mL GEN, and 7.8 µg/mL RIF.

516

517

518  
519  
520

**Table 3. Minimum inhibitory concentrations (MICs) of top active herbal products against *B. henselae***

| <b>Herbal Products</b>                  | <b>MIC (v/v)</b> |
|-----------------------------------------|------------------|
| <i>Juglans nigra</i> 60% AE             | 0.125%-0.25%     |
| <i>Juglans nigra</i> 90% AE             | 0.25%-0.5%       |
| <i>Polygonum cuspidatum</i> 30% AE      | 0.25%-0.5%       |
| <i>Cryptolepis sanguinolenta</i> 30% AE | 0.25%-0.5%       |
| <i>Cryptolepis sanguinolenta</i> 60% AE | 0.25%-0.5%       |
| <i>Cryptolepis sanguinolenta</i> 90% AE | 0.25%-0.5%       |
| <i>Scutellaria baicalensis</i> GE       | 0.25%-0.5%       |
| <i>Scutellaria barbata</i> GE           | 0.25%-0.5%       |

521  
522  
523  
524  
525  
526

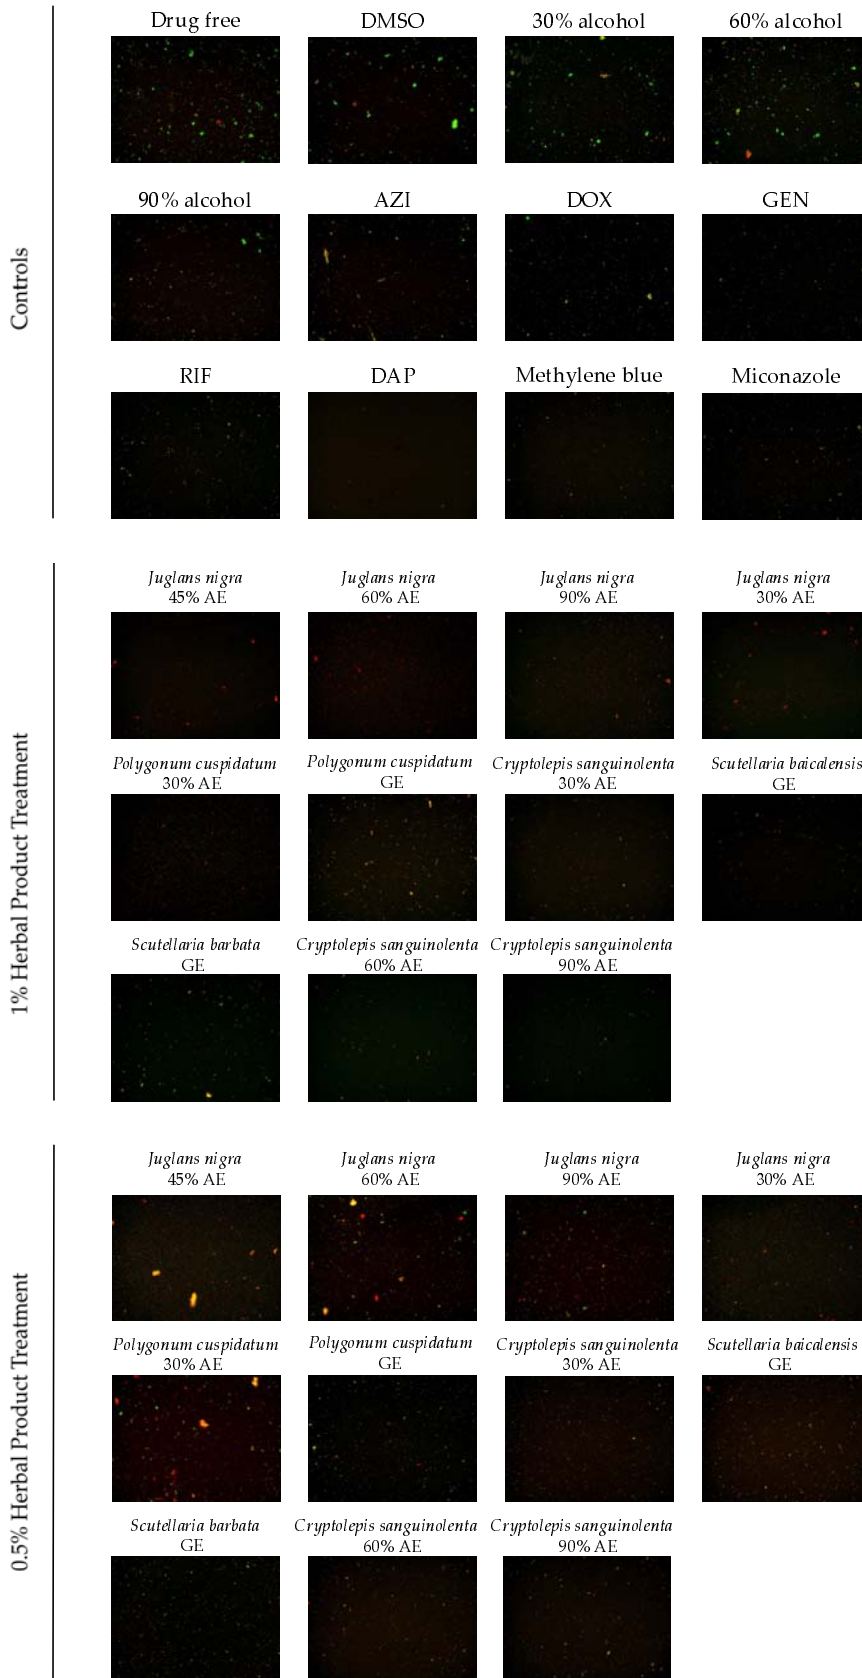

528  
529  
530  
531  
532  
533  
534  
535  
536  
537  
538  
539  
540  
541  
542

**Figure 1. Effect of top hits of herbal products against stationary phase *B. henselae* in comparison with control drugs.** A five-day-old stationary phase *B. henselae* culture was treated with 1% (v/v) or 0.5% (v/v) herbal products or control antibiotics for three days followed by SYBR Green I/PI viability assay and fluorescence microscopy (400 × magnification). Drug concentrations used were based on their Cmax and were as follows: 0.2 µg/mL AZI, 2.4 µg/mL DOX, 10 µg/mL GEN, 7.8 µg/mL RIF, 60 µg/mL DAP, 2.9 µg/mL methylene blue, and 6.3 µg/mL miconazole. Green cells represent live cells and red cells represent dead cells.

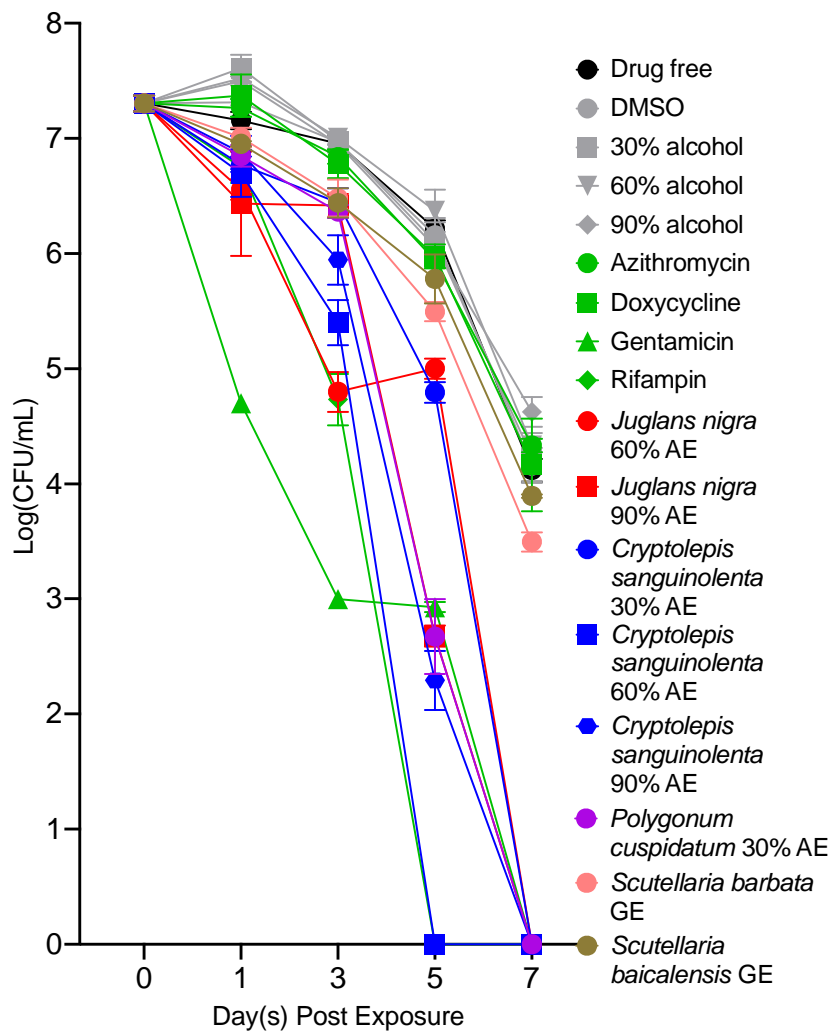

544 **Figure 2. Time-kill curves of active herbal product treatment against stationary phase *B. henselae***  
545 **in comparison with control drugs.** The herbal products or control antibiotics were added to the five-day  
546 old stationary phase culture respectively at time point 0, and at different times of drug exposure (day 1,  
547 day 3, day 5, and day 7), portions of bacteria were removed and washed and plated on Columbia blood  
548 agar plates for CFU counts. The herbal product concentration used in this experiment was 0.25% (v/v).  
549 Drug concentrations used in this experiment were based on their Cmax and were as follows: 0.2 µg/mL  
550 AZI, 2.4 µg/mL DOX, 10 µg/mL GEN, and 7.8 µg/mL RIF.

551

552

553

554

555

## 556 References

- 557 1. Jacomo, V.; Kelly, P.J.; Raoult, D. Natural history of Bartonella infections (an exception to  
558 Koch's postulate). *Clin Diagn Lab Immunol.* **2002**, 9, 8-18.
- 559 2. Okaro, U.; Addisu, A.; Casanas, B.; Anderson, B. *Bartonella* Species, an emerging cause of  
560 blood-culture-negative endocarditis. *Clin. Microbiol. Rev.* **2017**, 30, 709-746.
- 561 3. Harms A, Dehio C. Intruders below the radar: molecular pathogenesis of Bartonella spp. *Clin*  
562 *Microbiol Rev.* 2012;25(1):42–78. doi:10.1128/CMR.05009-11
- 563 4. Dehio C. Infection-associated type IV secretion systems of Bartonella and their diverse roles  
564 in host cell interaction. *Cell Microbiol.* 2008;10(8):1591–1598. doi:10.1111/j.1462-  
565 5822.2008.01171.x
- 566 5. Deng H, Pang Q, Zhao B, Vayssier-Taussat M. Molecular Mechanisms of *Bartonella* and  
567 Mammalian Erythrocyte Interactions: A Review. *Front Cell Infect Microbiol.* 2018;8:431.  
568 Published 2018 Dec 12. doi:10.3389/fcimb.2018.00431
- 569 6. Minnick MF, Battisti JM. Pestilence, persistence and pathogenicity: infection strategies of  
570 Bartonella. *Future Microbiol.* 2009;4(6):743–758. doi:10.2217/fmb.09.41
- 571 7. Breitschwerdt EB. Bartonellosis, One Health and all creatures great and small. *Vet Dermatol.*  
572 2017;28(1):96–e21. doi:10.1111/vde.12413
- 573 8. Ben-Tekaya H, Gorvel JP, Dehio C. Bartonella and Brucella--weapons and strategies for  
574 stealth attack. *Cold Spring Harb Perspect Med.* 2013;3(8):a010231. Published 2013 Aug 1.  
575 doi:10.1101/cshperspect.a010231
- 576 9. Wagner A, Dehio C. Role of distinct type-IV-secretion systems and secreted effector sets in  
577 host adaptation by pathogenic Bartonella species. *Cell Microbiol.* 2019;21(3):e13004.  
578 doi:10.1111/cmi.13004
- 579 10. Wagner A, Tittes C, Dehio C. Versatility of the BID Domain: Conserved Function as Type-  
580 IV-Secretion-Signal and Secondarily Evolved Effector Functions Within *Bartonella*-Infected  
581 Host Cells. *Front Microbiol.* 2019;10:921. Published 2019 May 3.  
582 doi:10.3389/fmicb.2019.00921
- 583 11. Pulliainen AT, Dehio C. Persistence of Bartonella spp. stealth pathogens: from subclinical  
584 infections to vasoproliferative tumor formation. *FEMS Microbiol Rev.* 2012;36(3):563–599.  
585 doi:10.1111/j.1574-6976.2012.00324.x
- 586 12. Cheslock MA, Embers ME. Human Bartonellosis: An Underappreciated Public Health  
587 Problem?. *Trop Med Infect Dis.* 2019;4(2):69. Published 2019 Apr 19.  
588 doi:10.3390/tropicalmed4020069
- 589 13. Bransfield RC. Neuropsychiatric Lyme Borreliosis: An Overview with a Focus on a  
590 Specialty Psychiatrist's Clinical Practice. *Healthcare (Basel).* 2018;6(3):104. Published 2018  
591 Aug 25. doi:10.3390/healthcare6030104
- 592 14. Bransfield RC. Aggressiveness, violence, homicidality, homicide, and Lyme  
593 disease. *Neuropsychiatr Dis Treat.* 2018;14:693–713. Published 2018 Mar 9.  
594 doi:10.2147/NDT.S155143
- 595 15. Breitschwerdt EB, Mascarelli PE, Schweickert LA, et al. Hallucinations, sensory neuropathy,  
596 and peripheral visual deficits in a young woman infected with Bartonella koehlerae. *J Clin*  
597 *Microbiol.* 2011;49(9):3415–3417. doi:10.1128/JCM.00833-11
- 598 16. Klotz, S.A.; Ianas, V.; Elliott, S.P. Cat-scratch Disease. *Am Fam Physician.* **2011**, 83, 152-  
599 155.

- 600 17. Johnson A. Ocular complications of cat scratch disease [published online ahead of print,  
601 2020 Mar 2]. *Br J Ophthalmol*. 2020;bjophthalmol-2019-315239. doi:10.1136/bjophthalmol-  
602 2019-315239
- 603 18. Florin, T.A.; Zaoutis, T.E.; Zaoutis, L.B. Beyond cat scratch disease: widening spectrum of  
604 *Bartonella henselae* infection. *Pediatrics*. **2008**, 121, e1413-1425.
- 605 19. Baranowski K, Huang B. Cat Scratch Disease. In: *StatPearls*. Treasure Island (FL):  
606 StatPearls Publishing; 2020.
- 607 20. Balakrishnan N, Ericson M, Maggi R, Breitschwerdt EB. Vasculitis, cerebral infarction and  
608 persistent *Bartonella henselae* infection in a child. *Parasit Vectors*. 2016;9(1):254. Published  
609 2016 May 10. doi:10.1186/s13071-016-1547-9
- 610 21. Arisoy ES, Correa AG, Wagner ML, Kaplan SL. Hepatosplenic cat-scratch disease in  
611 children: selected clinical features and treatment. *Clin Infect Dis*. 1999;28(4):778–784.  
612 doi:10.1086/515197
- 613 22. Edouard S, Nabet C, Lepidi H, Fournier PE, Raoult D. *Bartonella*, a common cause of  
614 endocarditis: a report on 106 cases and review. *J Clin Microbiol*. 2015;53(3):824–829.  
615 doi:10.1128/JCM.02827-14
- 616 23. Krause R, Auner HW, Daxböck F, et al. Monoclonal and biclonal gammopathy in two  
617 patients infected with *Bartonella henselae*. *Ann Hematol*. 2003;82(7):455–457.  
618 doi:10.1007/s00277-003-0675-4
- 619 24. Breitschwerdt EB, Greenberg R, Maggi RG, Mozayeni BR, Lewis A, Bradley JM. *Bartonella*  
620 *henselae* Bloodstream Infection in a Boy With Pediatric Acute-Onset Neuropsychiatric  
621 Syndrome. *J Cent Nerv Syst Dis*. 2019;11:1179573519832014. Published 2019 Mar 18.  
622 doi:10.1177/1179573519832014
- 623 25. Rissardo JP, Caprara ALF. Transverse myelitis and Guillain-Barré syndrome overlap  
624 secondary to *Bartonella henselae*: Case report. *Prague Med Rep*. 2019;120(4):131–137.  
625 doi:10.14712/23362936.2019.18
- 626 26. Baylor P, Garoufi A, Karpathios T, Lutz J, Mogelof J, Moseley D. Transverse myelitis in 2  
627 patients with *Bartonella henselae* infection (cat scratch disease). *Clin Infect Dis*.  
628 2007;45(4):e42–e45. doi:10.1086/519998
- 629 27. Chiuri RM, Matronola MF, Di Giulio C, Comegna L, Chiarelli F, Blasetti A. *Bartonella*  
630 *henselae* infection associated with autoimmune thyroiditis in a child. *Horm Res Paediatr*.  
631 2013;79:185–188. doi:10.1159/000346903
- 632 28. Nelder MP, Russell CB, Sheehan NJ, et al. Human pathogens associated with the  
633 blacklegged tick *Ixodes scapularis*: a systematic review. *Parasit Vectors*. 2016;9:265.  
634 Published 2016 May 5. doi:10.1186/s13071-016-1529-y
- 635 29. Seo JW, Kim CM, Yun NR, et al. Scalp eschar and neck lymphadenopathy after tick bite  
636 (SENLAT) caused by *Bartonella henselae* in Korea: a case report. *BMC Infect Dis*.  
637 2020;20(1):216. Published 2020 Mar 12. doi:10.1186/s12879-020-4940-0
- 638 30. Angelakis E, Pulcini C, Waton J, et al. Scalp eschar and neck lymphadenopathy caused by  
639 *Bartonella henselae* after Tick Bite. *Clin Infect Dis*. 2010;50(4):549–551.  
640 doi:10.1086/650172
- 641 31. Eskow, E.; Rao, R.V.; Mordechai, E. Concurrent infection of the central nervous system by  
642 *Borrelia burgdorferi* and *Bartonella henselae*: evidence for a novel tick-borne disease  
643 complex. *Arch Neurol*. **2001**, 58, 1357-1363.



- 644 32. Garg K, Meriläinen L, Franz O, et al. Evaluating polymicrobial immune responses in patients  
645 suffering from tick-borne diseases. *Sci Rep.* 2018;8(1):15932. Published 2018 Oct 29.  
646 doi:10.1038/s41598-018-34393-9
- 647 33. Johnson L, Shapiro M, Mankoff J. Removing the Mask of Average Treatment Effects in  
648 Chronic Lyme Disease Research Using Big Data and Subgroup Analysis. *Healthcare (Basel).*  
649 2018;6(4):124. Published 2018 Oct 12. doi:10.3390/healthcare6040124
- 650 34. Mayne PJ. Clinical determinants of Lyme borreliosis, babesiosis, bartonellosis,  
651 anaplasmosis, and ehrlichiosis in an Australian cohort. *Int J Gen Med.* 2014;8:15–26.  
652 Published 2014 Dec 23. doi:10.2147/IJGM.S75825
- 653 35. Angelakis, E.; Raoult, D. Pathogenicity and treatment of *Bartonella* infections. *Int. J.*  
654 *Antimicrob. Agents.* **2014**, 44, 16-25.
- 655 36. Biswas, S.; Rolain, J.M. *Bartonella* infection: treatment and drug resistance. *Future.*  
656 *Microbiol.* **2010**, 5, 1719-1731.
- 657 37. Prutsky G, Domecq JP, Mori L, et al. Treatment outcomes of human bartonellosis: a  
658 systematic review and meta-analysis. *Int J Infect Dis.* 2013;17(10):e811–e819.  
659 doi:10.1016/j.ijid.2013.02.016
- 660 38. Zhang, Y. Persisters, persistent infections and the Yin-Yang model. *Emerg Microbes Infect.*  
661 **2014**, 3, e3.
- 662 39. Borchardt, J.K. The Beginnings of Drug Therapy: Ancient Mesopotamian Medicine. *Drug*  
663 *News Perspect.* **2002**, 15, 187-192.
- 664 40. Patwardhan, B.; Warude, D.; Pushpangadan, P.; Bhatt, N. Ayurveda and traditional Chinese  
665 medicine: a comparative overview. *Evid Based Complement Alternat Med.* **2005**, 2, 465-473.
- 666 41. Jaiswal, Y.; Liang, Z.; Zhao, Z. Botanical drugs in Ayurveda and Traditional Chinese  
667 Medicine. *J Ethnopharmacol.* **2016**, 194, 245-259.
- 668 42. Di Lorenzo, C.; Ceschi, A.; Kupferschmidt, H.; Lude, S.; De Souza Nascimento, E.; Dos  
669 Santos, A.; Colombo, F.; Frigerio, G.; Norby, K.; Plumb, J. et al. Adverse effects of plant  
670 food supplements and botanical preparations: a systematic review with critical evaluation of  
671 causality. *Br J Clin Pharmacol.* **2015**, 79, 578-592.
- 672 43. Garcia-Alvarez, A.; Mila-Villarroel, R.; Ribas-Barba, L.; Egan, B.; Badea, M.; Maggi, F.M.;  
673 Salmenhaara, M.; Restani, P.; Serra-Majem, L.; Plant, L.P.F.S.C.S.g. Usage of Plant Food  
674 Supplements (PFS) for weight control in six European countries: results from the  
675 PlantLIBRA PFS Consumer Survey 2011-2012. *BMC Complement Altern Med.* **2016**, 16,  
676 254.
- 677 44. Lude, S.; Vecchio, S.; Sinno-Tellier, S.; Dopter, A.; Mustonen, H.; Vucinic, S.; Jonsson, B.;  
678 Muller, D.; Veras Gimenez Fruchtengarten, L.; Hruby, K. et al. Adverse effects of plant food  
679 supplements and plants consumed as food: Results from the Poisons Centres-Based  
680 PlantLIBRA Study. *Phytother Res.* **2016**, 30, 988-996.
- 681 45. Zimmermann P, Curtis N. The effect of antibiotics on the composition of the intestinal  
682 microbiota - a systematic review. *J Infect.* 2019;79(6):471–489.  
683 doi:10.1016/j.jinf.2019.10.008

- 684 46. Pilmis B, Le Monnier A, Zahar JR. Gut microbiota, antibiotic therapy and antimicrobial  
685 resistance: A narrative review. *Microorganisms*. 2020;8(2):269. Published 2020 Feb 17.  
686 doi:10.3390/microorganisms8020269
- 687 47. An X, Bao Q, Di S, et al. The interaction between the gut Microbiota and herbal  
688 medicines. *Biomed Pharmacother*. 2019;118:109252. doi:10.1016/j.biopha.2019.109252
- 689 48. Popovic, V.B.; Tomic, M.A.; Stepanovic-Petrovic, R.M.; Micov, A.M.; Milenkovic, M.T.;  
690 Petrovic, S.D.; Usjak, L.J.; Niketic, M.S. Laserpitium zernyi hayek flower and herb extracts:  
691 phenolic compounds, and anti-edematous, antioxidant, and antimicrobial activities. *Chem*  
692 *Biodivers*. **2017**, 14.
- 693 49. Denes, T.; Bartha, S.G.; Kerényi, M.; Varga, E.; Balazs, V.L.; Csepregi, R.; Papp, N.  
694 Histological and antimicrobial study of *Ononis arvensis* L. *Acta Biol Hung*. **2017**, 68, 321-  
695 333.
- 696 50. Hickl, J.; Argyropoulou, A.; Sakavitsi, M.E.; Halabalaki, M.; Al-Ahmad, A.; Hellwig, E.;  
697 Aligiannis, N.; Skaltsounis, A.L.; Wittmer, A.; Vach, K. et al. Mediterranean herb extracts  
698 inhibit microbial growth of representative oral microorganisms and biofilm formation of  
699 *Streptococcus mutans*. *PLoS One*. **2018**, 13, e0207574.
- 700 51. Ma, X.; Shi, W.; Zhang, Y. Essential oils with high Activity against Stationary Phase  
701 *Bartonella henselae*. *Antibiotics*. **2019**, 8(4), 246.
- 702 52. World Health Organization, Antibiotic Resistance FAQ sheet: [https://www.who.int/news-](https://www.who.int/news-room/fact-sheets/detail/antibiotic-resistance)  
703 [room/fact-sheets/detail/antibiotic-resistance](https://www.who.int/news-room/fact-sheets/detail/antibiotic-resistance) (accessed 5.23.2020)
- 704 53. Feng, J.; Wang, T.; Zhang, S.; Shi, W.; Zhang, Y. An optimized SYBR Green I/PI assay for  
705 rapid viability assessment and antibiotic susceptibility testing for *Borrelia burgdorferi*. *PLoS*  
706 *One*. **2014**, 9, e111809.
- 707 54. Feng, J.; Zhang, S.; Shi, W.; Zubcevik, N.; Miklossy, J.; Zhang, Y. Selective Essential Oils  
708 from Spice or Culinary Herbs Have High Activity against Stationary Phase and Biofilm  
709 *Borrelia burgdorferi*. *Front. Med (Lausanne)*. **2017**, 4, 169.
- 710 55. Feng, J.; Shi, W.; Zhang, S.; Sullivan, D.; Auwaerter, P.G.; Zhang, Y. A Drug Combination  
711 screen identifies drugs active against amoxicillin-induced round bodies of *in vitro* *Borrelia*  
712 *burgdorferi* persists from an FDA drug library. *Front. Microbiol*. **2016**, 7, 743.
- 713 56. Feng, J.; Leone, J.; Schweig, S.; Zhang, Y. Evaluation of natural and botanical medicines for  
714 activity against growing and non-growing forms of *B. burgdorferi*. *Front Med (Lausanne)*.  
715 **2020**, 7, 6.
- 716 57. Li, T.; Feng, J.; Xiao, S.; Shi, W.; Sullivan, D.; Zhang, Y. Identification of FDA-approved  
717 drugs with activity against stationary phase *Bartonella henselae*. *Antibiotics (Basel)*. **2019**, 8.
- 718 58. Lewis, K. Multidrug tolerance of biofilms and persister cells. *Curr Top Microbiol Immunol*.  
719 **2008**, 322, 107-131.
- 720 59. Riess T.; Dietrich F.; Schmidt K.V.; Kaiser P.O.; Schwarz H.; Schäfer A.; Kempf V.A.  
721 Analysis of a novel insect cell culture medium-based growth medium for *Bartonella* species.  
722 *Appl Environ Microbiol*. **2008**, 74, 5224-7.
- 723 60. Goc, A.; Rath, M. The anti-borreliae efficacy of phytochemicals and micronutrients: an  
724 update. *Ther Adv Infect Dis*. **2016**, 3, 75-82.

- 725 61. Mills-Robertson, F.C.; Tay, S.C.; Duker-Eshun, G.; Walana, W.; Badu, K. In vitro  
726 antimicrobial activity of ethanolic fractions of *Cryptolepis sanguinolenta*. *Ann Clin*  
727 *Microbiol Antimicrob.* **2012**, 11, 16.
- 728 62. Marinas, I.C.; Oprea, E.; Chifiriuc, M.C.; Badea, I.A.; Buleandra, M.; Lazar, V. Chemical  
729 composition and antipathogenic activity of *Artemisia annua* essential oil from Romania.  
730 *Chem Biodivers.* **2015**, 12, 1554-1564.
- 731 63. Ruiz-Ruiz, J.C.; Moguel-Ordonez, Y.B.; Segura-Campos, M.R. Biological activity of *Stevia*  
732 *rebaudiana* Bertoni and their relationship to health. *Crit Rev Food Sci Nutr.* **2017**, 57, 2680-  
733 2690.
- 734 64. Herrera, D.R.; Durand-Ramirez, J.E.; Falcao, A.; Silva, E.J.; Santos, E.B.; Gomes, B.P.  
735 Antimicrobial activity and substantivity of *Uncaria tomentosa* in infected root canal dentin.  
736 *Braz Oral Res.* **2016**, 30, e61.
- 737 65. Performance Standards for Antimicrobial Susceptibility Testing. Available online:  
738 <https://clsi.org/standards/products/microbiology/documents/m100/> (accessed on 13  
739 December 2018).
- 740 66. Bi, D.; Zhao, Y.; Jiang, R.; Wang, Y.; Tian, Y.; Chen, X.; Bai, S.; She, G. Phytochemistry,  
741 bioactivity and potential impact on health of juglans: the original plant of walnut. *Nat Prod*  
742 *Commun.* **2016**, 11, 869-880.
- 743 67. Catanzaro, E.; Greco, G.; Potenza, L.; Calcabrini, C.; Fimognari, C. Natural products to fight  
744 cancer: A focus on *Juglans regia*. *Toxins (Basel).* **2018**, 10.
- 745 68. Wianowska, D.; Garbaczewska, S.; Cieniecka-Roslonkiewicz, A.; Dawidowicz, A.L.;  
746 Jankowska, A. Comparison of antifungal activity of extracts from different *Juglans regia*  
747 cultivars and juglone. *Microb Pathog.* **2016**, 100, 263-267.
- 748 69. Karvonen, K.; Gilbert, L. Effective killing of *Borrelia burgdorferi* in vitro with novel herbal  
749 compounds. *General Medicine Open.* **2018**, 2.
- 750 70. Panth, N.; Paudel, K.R.; Karki, R. Phytochemical profile and biological activity of *Juglans*  
751 *regia*. *J Integr Med.* **2016**, 14, 359-373.
- 752 71. Hayes, D.; Angove, M.J.; Tucci, J.; Dennis, C. Walnuts (*Juglans regia*) chemical composition  
753 and research in human health. *Crit Rev Food Sci Nutr.* **2016**, 56, 1231-1241.
- 754 72. Ahmad, T.; Suzuki, Y.J. Juglone in oxidative stress and cell signaling. *Antioxidants (Basel).*  
755 **2019**, 8.
- 756 73. Zmantar, T.; Miladi, H.; Kouidhi, B.; Chaabouni, Y.; Ben Slama, R.; Bakhrouf, A.;  
757 Mahdouani, K.; Chaieb, K. Use of juglone as antibacterial and potential efflux pump  
758 inhibitors in *Staphylococcus aureus* isolated from the oral cavity. *Microb Pathog.* **2016**, 101,  
759 44-49.
- 760 74. Ho, K.V.; Lei, Z.; Sumner, L.W.; Coggeshall, M.V.; Hsieh, H.Y.; Stewart, G.C.; Lin, C.H.  
761 Identifying antibacterial compounds in black walnuts (*Juglans nigra*) using a metabolomics  
762 approach. *Metabolites.* **2018**, 8.
- 763 75. Ozelik, B.; Kartal, M.; Orhan, I. Cytotoxicity, antiviral and antimicrobial activities of  
764 alkaloids, flavonoids, and phenolic acids. *Pharm Biol.* **2011**, 49, 396-402.

- 765 76. Paudel, P.; Satyal, P.; Dosoky, N.S.; Maharjan, S.; Setzer, W.N. Juglans regia and J. nigra,  
766 two trees important in traditional medicine: A comparison of leaf essential oil compositions  
767 and biological activities. *Nat Prod Commun.* **2013**, 8, 1481-1486.
- 768 77. Aithal BK, Sunil Kumar MR, Rao BN, et al. Evaluation of pharmacokinetic, biodistribution,  
769 pharmacodynamic, and toxicity profile of free juglone and its sterically stabilized  
770 liposomes. *J Pharm Sci.* 2011;100(8):3517–3528. doi:10.1002/jps.22573
- 771 78. Forkuo, A.D.; Ansah, C.; Mensah, K.B.; Annan, K.; Gyan, B.; Theron, A.; Mancama, D.;  
772 Wright, C.W. In vitro anti-malarial interaction and gametocytocidal activity of cryptolepine.  
773 *Malar J.* **2017**, 16, 496.
- 774 79. Tona, L.; Kambu, K.; Ngimbi, N.; Cimanga, K.; Vlietinck, A.J. Antiamoebic and  
775 phytochemical screening of some Congolese medicinal plants. *J Ethnopharmacol.* **1998**, 61,  
776 57-65.
- 777 80. Cimanga, K.; De Bruyne, T.; Pieters, L.; Totte, J.; Tona, L.; Kambu, K.; Berghe, D.V.;  
778 Vlietinck, A.J. Antibacterial and antifungal activities of neocryptolepine, biscryptolepine and  
779 cryptoquindoline, alkaloids isolated from *Cryptolepis sanguinolenta*. *Phytomedicine.* **1998**, 5,  
780 209-214.
- 781 81. Hanprasertpong, N.; Teekachunhatean, S.; Chaiwongsa, R.; Ongchai, S.; Kunanusorn, P.;  
782 Sangdee, C.; Panthong, A.; Bunteang, S.; Nathasaen, N.; Reutrakul, V. Analgesic, anti-  
783 inflammatory, and chondroprotective activities of *Cryptolepis buchanani* extract: in vitro and  
784 in vivo studies. *Biomed Res Int.* **2014**, 2014, 978582.
- 785 82. Ansah, C.; Mensah, K.B. A review of the anticancer potential of the antimalarial herbal  
786 cryptolepis sanguinolenta and its major alkaloid cryptolepine. *Ghana Med J.* **2013**, 47, 137-  
787 147.
- 788 83. Osafo, N.; Mensah, K.B.; Yeboah, O.K. Phytochemical and pharmacological review of  
789 *Cryptolepis sanguinolenta* (Lindl.) Schlechter. *Adv Pharmacol Sci.* **2017**, 2017, 3026370.
- 790 84. Sawyer, I.K.; Berry, M.I.; Ford, J.L. The killing effect of cryptolepine on *Staphylococcus*  
791 *aureus*. *Lett Appl Microbiol.* **2005**, 40, 24-29.
- 792 85. Lisgarten, J.N.; Coll, M.; Portugal, J.; Wright, C.W.; Aymami, J. The antimalarial and  
793 cytotoxic drug cryptolepine intercalates into DNA at cytosine-cytosine sites. *Nat Struct Biol.*  
794 **2002**, 9, 57-60.
- 795 86. Pal, H.C.; Katiyar, S.K. Cryptolepine, a plant alkaloid, inhibits the growth of non-melanoma  
796 skin cancer cells through inhibition of topoisomerase and induction of DNA damage.  
797 *Molecules.* **2016**, 21.
- 798 87. Bugyei KA, Boye GL, Addy ME. Clinical efficacy of a tea-bag formulation of cryptolepis  
799 sanguinolenta root in the treatment of acute uncomplicated falciparum malaria. *Ghana Med*  
800 *J.* 2010;44(1):3–9. doi:10.4314/gmj.v44i1.68849
- 801 88. Buhner SH. Natural Treatments for Lyme Coinfections: Anaplasma, Babesia, and Ehrlichia.  
802 Inner Traditions Bear and Company (2015).
- 803 89. Kim, J.R.; Oh, D.R.; Cha, M.H.; Pyo, B.S.; Rhee, J.H.; Choy, H.E.; Oh, W.K.; Kim, Y.R.  
804 Protective effect of *Polygoni cuspidati* radix and emodin on *Vibrio vulnificus* cytotoxicity  
805 and infection. *J Microbiol.* **2008**, 46, 737-743.
- 806 90. Song, J.H.; Kim, S.K.; Chang, K.W.; Han, S.K.; Yi, H.K.; Jeon, J.G. In vitro inhibitory

- 807 effects of *Polygonum cuspidatum* on bacterial viability and virulence factors of *Streptococcus*  
808 *mutans* and *Streptococcus sobrinus*. *Arch Oral Biol.* **2006**, 51, 1131-1140.
- 809 91. Pandit, S.; Kim, H.J.; Park, S.H.; Jeon, J.G. Enhancement of fluoride activity against  
810 *Streptococcus mutans* biofilms by a substance separated from *Polygonum cuspidatum*.  
811 *Biofouling.* **2012**, 28, 279-287.
- 812 92. Wu, X.; Li, Q.; Feng, Y.; Ji, Q. Antitumor research of the active ingredients from traditional  
813 chinese medical plant *Polygonum cuspidatum*. *Evid Based Complement Alternat Med.* **2018**,  
814 2018, 2313021.
- 815 93. Zhang, H.; Li, C.; Kwok, S.T.; Zhang, Q.W.; Chan, S.W. A review of the pharmacological  
816 effects of the dried root of *Polygonum cuspidatum* (Hu Zhang) and its constituents. *Evid*  
817 *Based Complement Alternat Med.* **2013**, 2013, 208349.
- 818 94. Breuss, J.M.; Atanasov, A.G.; Uhrin, P. Resveratrol and its effects on the vascular system. *Int*  
819 *J Mol Sci.* **2019**, 20.
- 820 95. Abdelgawad, I.Y.; Grant, M.K.O.; Zordoky, B.N. Leveraging the cardio-protective and  
821 anticancer properties of resveratrol in cardio-oncology. *Nutrients.* **2019**, 11.
- 822 96. Vestergaard, M.; Ingmer, H. Antibacterial and antifungal properties of resveratrol. *Int J*  
823 *Antimicrob Agents.* **2019**, 53, 716-723.
- 824 97. Feng, J.; Shi, W.; Zhang, S.; Zhang, Y. Identification of new compounds with high activity  
825 against stationary phase *Borrelia burgdorferi* from the NCI compound collection. *Emerg*  
826 *Microbes Infect.* **2015**, 4, e31.
- 827 98. Pan, B.; Shi, X.; Ding, T.; Liu, L. Unraveling the action mechanism of polygonum  
828 *cuspidatum* by a network pharmacology approach. *Am J Transl Res.* **2019**, 11, 6790-6811.
- 829 99. Vecchioli-Scaldazza C, Morosetti C, Maruccia S, et al. A randomized, multicenter,  
830 controlled study, comparing efficacy and safety of a new complementary and alternative  
831 medicine (CAM) versus Solifenacin Succinate in women with overactive bladder  
832 syndrome. *Arch Ital Urol Androl.* 2017;89(4):296–300. Published 2017 Dec 31.  
833 doi:10.4081/aiua.2017.4.296
- 834 100. Ghanim H, Sia CL, Abuaysheh S, et al. An anti-inflammatory and reactive oxygen  
835 species suppressive effects of an extract of *Polygonum cuspidatum* containing resveratrol. *J*  
836 *Clin Endocrinol Metab.* 2010;95(9):E1–E8. doi:10.1210/jc.2010-0482
- 837 101. Cottart CH, Nivet-Antoine V, Laguillier-Morizot C, Beaudoux JL. Resveratrol  
838 bioavailability and toxicity in humans. *Mol Nutr Food Res.* 2010;54(1):7–16.  
839 doi:10.1002/mnfr.200900437
- 840 102. Cottart CH, Nivet-Antoine V, Beaudoux JL. Review of recent data on the metabolism,  
841 biological effects, and toxicity of resveratrol in humans. *Mol Nutr Food Res.* 2014;58(1):7–  
842 21. doi:10.1002/mnfr.201200589
- 843 103. La Porte, C.; Voduc, N.; Zhang, G.; Seguin, I.; Tardiff, D.; Singhal, N.; Cameron, D.W.  
844 Steady-State pharmacokinetics and tolerability of trans-resveratrol 2000 mg twice daily with  
845 food, quercetin and alcohol (ethanol) in healthy human subjects. *Clin Pharmacokinet.* **2010**,  
846 49, 449-454.
- 847 104. Maaland, M.G.; Papich, M.G.; Turnidge, J.; Guardabassi, L. Pharmacodynamics of  
848 doxycycline and tetracycline against *Staphylococcus pseudintermedius*: proposal of canine-

849 specific breakpoints for doxycycline. *J Clin Microbiol.* **2013**, 51, 3547-3554.

850 105. Lode, H.; Borner, K.; Koeppe, P.; Schaberg, T. Azithromycin--review of key chemical,  
851 pharmacokinetic and microbiological features. *J Antimicrob Chemother.* **1996**, 37 Suppl C,  
852 1-8.

853 106. Zhang, Y.; Shi, W.; Zhang, W.; Mitchison, D. Mechanisms of pyrazinamide action and  
854 resistance. *Microbiol Spectr.* **2013**, 2(4), 1-12.

855 107. Feng, J.; Wang, T.; Shi, W.; Zhang, S.; Sullivan, D.; Auwaerter P.G.; Zhang, Y.  
856 Identification of novel activity against *Borrelia burgdorferi* persisters using an FDA  
857 approved drug library. *Emerg Microbes Infect.* **2014**, 3(7), e49.

858 108. Breitschwerdt, E.B.; Kordick, D.L. *Bartonella* infection in animals: carriership, reservoir  
859 potential, pathogenicity, and zoonotic potential for human infection. *Clin. Microbiol. Rev.*  
860 **2000**, 13, 428-438. Zheng X, Ma X, Li T, Shi W, Zhang Y. Effect of different drugs and drug  
861 combinations on killing stationary phase and biofilms recovered cells of *Bartonella henselae*  
862 in vitro. *BMC Microbiol.* **2020**;20(1):87.

863

864

865

866

867

868

869

870

871

872

873

874

875

876

877

878

879

880

881

882

883

884

885

886

887

888

889

890

891

892 **Table S1. Herbal product sources, validation, and extract details**

| Herbal Products                  | Trade Names of Herbal Products | Source                                        | Validation/ID                                                                                                                                                    | Extract Details                                                        |
|----------------------------------|--------------------------------|-----------------------------------------------|------------------------------------------------------------------------------------------------------------------------------------------------------------------|------------------------------------------------------------------------|
| <i>Juglans nigra</i> (husk/hull) | Black walnut                   | Pacific Botanicals (Wild harvested)           | Organoleptic, KW Botanicals                                                                                                                                      | 45% ETOH extract of husk/hulls by KW Botanicals                        |
| <i>Juglans nigra</i> (husk)      | Black walnut                   | Heron Botanicals (Wild harvested, New York)   | Organoleptic, Heron Botanicals                                                                                                                                   | 30, 60, 90% ETOH by Heron Botanicals                                   |
| <i>Rhizoma coptidis</i>          | Coptis                         | Hawaii Pharm LLC (Certified organic coptis)   | Organoleptic, Hawaii Pharm, LLC                                                                                                                                  | Dry Herb Glycerite, Herb/Menstruum ratio 1:3, Glycerin/Water ratio 6:4 |
| <i>Polygonum cuspidatum</i>      | Japanese knotweed              | Heron Botanicals (Organic cultivation, China) | Organoleptic, Heron Botanicals                                                                                                                                   | 30% ETOH by Heron Botanicals                                           |
| <i>Stevia rebaudiana</i>         | Tian ju ye                     | Sonoma County Herb Exchange (Cultivated)      | Organoleptic, KW Botanicals                                                                                                                                      | 25% ETOH extract by KW Botanicals                                      |
| <i>Uncaria tomentosa</i> bark    | Samento                        | NutraMedix, LLC (Jupiter, Florida)            | Per manufacturer                                                                                                                                                 | Samento bark 20-24% ETOH extract                                       |
| <i>Citrus paradisi</i>           | Grapefruit extract seed        | Cintamani, Poland (Citrosept™)                | Cintamani, Poland                                                                                                                                                | Organic grapefruit seed extract                                        |
| <i>Andrographis paniculata</i>   | Chuan xin lian                 | Hawaii Pharm LLC (Wild harvested, China)      | Organoleptic, Hawaii Pharm, LLC                                                                                                                                  | Dry Herb Glycerite, Herb/Menstruum ratio 1:3, Glycerin/Water ratio 6:4 |
| <i>Artemisia annua</i>           | Sweet wormwood                 | Heron Botanicals (Organic cultivation)        | American Herbal Pharmacopoeia (Scotts Valley, CA), Organoleptic, Heron Botanicals Confirmed 0.11% Artemisinin content, The Institute for Food Safety and Defense | 30, 60, 90% ETOH by Heron Botanicals                                   |
| <i>Otoba</i> spp. bark           | Banderol                       | NutraMedix, LLC (Jupiter, Florida)            | Per manufacturer                                                                                                                                                 | Banderol bark 20-24% ETOH extract                                      |
| <i>Polygonum cuspidatum</i>      | Hu zhang                       | Hawaii Pharm LLC (Wild harvested,             | Organoleptic, Hawaii Pharm, LLC                                                                                                                                  | Dry Herb Glycerite,                                                    |

|                                      |                 |                                                          |                                                                                 |  |                                                                                                  |
|--------------------------------------|-----------------|----------------------------------------------------------|---------------------------------------------------------------------------------|--|--------------------------------------------------------------------------------------------------|
|                                      |                 | China)                                                   |                                                                                 |  | Herb/Menstruum ratio 1:3, Glycerin/Water ratio 6:4                                               |
| <i>Cryptolepis sanguinolenta</i>     | Cryptolepis     | Heron Botanicals (Wild harvested, Ghana)                 | HPTLC, The Institute for Food Safety and Defense Organoleptic, Heron Botanicals |  | 30, 60, 90% ETOH by Heron Botanicals                                                             |
| <i>Scutellaria baicalensis</i>       | Huang qin       | Hawaii Pharm LLC (Wild harvested, China)                 | Organoleptic, Hawaii Pharm, LLC                                                 |  | Dry Herb Glycerite, Herb/Menstruum ratio 1:3, Glycerin/Water ratio 6:4                           |
| <i>Scutellaria barbata</i>           | Ban zhi lian    | Hawaii Pharm LLC (Wild harvested, China)                 | Organoleptic, Hawaii Pharm, LLC                                                 |  | Dry Herb Glycerite, Herb/Menstruum ratio 1:3, Glycerin/Water ratio 6:4                           |
| <i>Campsiandra angustifolia</i> bark | Cumanda         | NutraMedix, LLC (Jupiter, Florida)                       | Per manufacturer                                                                |  | Cumanda bark 20-24% ETOH extract                                                                 |
| <i>Uncaria rhynchophylla</i>         | Gou Teng        | Hawaii Pharm LLC (Certified organic, China)              | Organoleptic, Hawaii Pharm, LLC                                                 |  | Dry Herb Glycerite, Herb/Menstruum ratio 1:3, Glycerin/Water ratio 6:4                           |
| <i>Dipsacus fullonum</i>             | Gao liang jiang | Friend's of the Trees (wild harvested, Washington State) | DNA Species Identification, NSF International                                   |  | 40% ETOH by KW Botanicals (Inadvertently comingled with <i>D. asper</i> sample prior to testing) |
| <i>Uncaria tomentosa</i>             | Uncaria         | Mountain Rose Herbs (Wild harvested)                     | DNA Species Identification, Christopher Hobbs, Ph.D.                            |  | 50% ETOH by KW Botanicals                                                                        |
| <i>Andrographis paniculata</i>       | Andrographis    | Heron Botanicals (Organic cultivation, China)            | Organoleptic, Heron Botanicals                                                  |  | 30% ETOH by Heron Botanicals                                                                     |
| Colloidal silver                     | Argentyn 23®    | Argentyn 23®                                             | Per manufacturer                                                                |  | Bio-Active Silver Hydrosol™                                                                      |

893

894



895

896 **Table S2. Activity of other tested herbal products against stationary phase *B. henselae*<sup>1</sup>**

| Herbal Products (HP) and Control Drugs | Trade Names of Herbal Products                  | Residual Viability (%) after 1% HP or Antibiotic Treatment |                         | Residual Viability (%) after 0.5% HP Treatment |                         |
|----------------------------------------|-------------------------------------------------|------------------------------------------------------------|-------------------------|------------------------------------------------|-------------------------|
|                                        |                                                 | Plate Reader <sup>2</sup>                                  | Microscope <sup>3</sup> | Plate Reader <sup>2</sup>                      | Microscope <sup>3</sup> |
| Drug free control                      |                                                 | 70%                                                        | 75%                     |                                                |                         |
| DMSO control                           |                                                 | 60%                                                        | 70%                     |                                                |                         |
| 30% alcohol                            |                                                 | 70%                                                        | 78%                     |                                                |                         |
| 60% alcohol                            |                                                 | 80%                                                        | 82%                     |                                                |                         |
| 90% alcohol                            |                                                 | 65%                                                        | 63%                     |                                                |                         |
| AZI                                    |                                                 | 70%                                                        | 65%                     |                                                |                         |
| DOX                                    |                                                 | 66%                                                        | 60%                     |                                                |                         |
| GEN                                    |                                                 | 44%                                                        | 50%                     |                                                |                         |
| RIF                                    |                                                 | 31%                                                        | 45%                     |                                                |                         |
| DAP                                    |                                                 | 6%                                                         | 10%                     |                                                |                         |
| Methylene Blue                         |                                                 | 29%                                                        | 35%                     |                                                |                         |
| Miconazole                             |                                                 | 40%                                                        | 50%                     |                                                |                         |
| Colloidal silver                       | Argentyn 23®                                    | 18%                                                        | 37%                     | 45%                                            | 76%                     |
| <i>Andrographis paniculata</i>         | Chuan xin lian GE (Hawaii Pharm)                | 19%                                                        | 38%                     | 24%                                            | 50%                     |
| <i>Uncaria rhynchophylla</i>           | Gou teng GE (Hawaii Pharm)                      | 19%                                                        | 39%                     | 43%                                            | 88%                     |
| <i>Rhizoma coptidis</i>                | Coptis GE (Hawaii Pharm)                        | 21%                                                        | 41%                     | 22%                                            | 50%                     |
| <i>Citrus paradisi</i>                 | Grapefruit seed extract (Citracept)             | 21%                                                        | 38%                     | 48%                                            | 89%                     |
| <i>Uncaria tomentosa</i> bark          | Samento 20-24% AE (NutraMedix)                  | 24%                                                        | 50%                     | 29%                                            | 65%                     |
| <i>Stevia rebaudiana</i> fol           | Tian ju ye 25% AE (Sonoma County Herb Exchange) | 24%                                                        | 40%                     | 48%                                            | 83%                     |
| <i>Artemisia annua</i>                 | Sweet wormwood 60% AE (Heron Botanical)         | 26%                                                        | 42%                     | 43%                                            | 75%                     |
| <i>Dipsacus fullonum</i>               | Teasel 40% AE (Friend's of the Trees)           | 28%                                                        | 57%                     | 40%                                            | 78%                     |
| <i>Artemisia annua</i>                 | Sweet wormwood 90% AE (Heron Botanical)         | 30%                                                        | 50%                     | 45%                                            | 80%                     |
| <i>Uncaria tomentosa</i> cort          | Uncaria 50% AE (Mountain Rose Herbs)            | 32%                                                        | 60%                     | 45%                                            | 82%                     |

|                                      |                                         |     |     |     |     |
|--------------------------------------|-----------------------------------------|-----|-----|-----|-----|
| <i>Andrographis paniculata</i>       | Andrographis 30% AE (Heron Botanicals)  | 35% | 65% | 44% | 81% |
| <i>Artemisia annua</i>               | Sweet wormwood 30% AE (Heron Botanical) | 40% | 70% | 58% | 90% |
| <i>Otoba sp.</i> bark                | Banderol 20-24% AE (NutraMedix)         | 41% | 83% | 50% | 87% |
| <i>Campsiandra angustifolia</i> bark | Cumanda 20-24% AE (NutraMedix)          | 50% | 85% | 56% | 90% |

897 <sup>1</sup> A five-day-old stationary phase *B. henselae* culture was treated with herbal products (1% or 0.5%) (v/v)  
898 or control drugs for three days. Drug concentrations used in this experiment were based on their C<sub>max</sub>  
899 and were as follows: 0.2 µg/mL AZI, 2.4 µg/mL DOX, 10 µg/mL GEN, 7.8 µg/mL RIF, 60 µg/mL DAP,  
900 2.9 µg/mL methylene blue, and 6.3 µg/mL miconazole. <sup>2</sup> Residual viability was calculated according to  
901 the regression equation and the ratio of Green/Red fluorescence obtained by SYBR Green I/PI assay. <sup>3</sup>  
902 Residual viability was assayed by fluorescence microscope counting as described in the Methods.

903
